# Supplementary material
Source: PubMed Central journal article supplement (PMC4126893)
Supplement: NIHMS573239-supplement-supplemental.pdf [file NIHMS573239-supplement-supplemental.pdf]

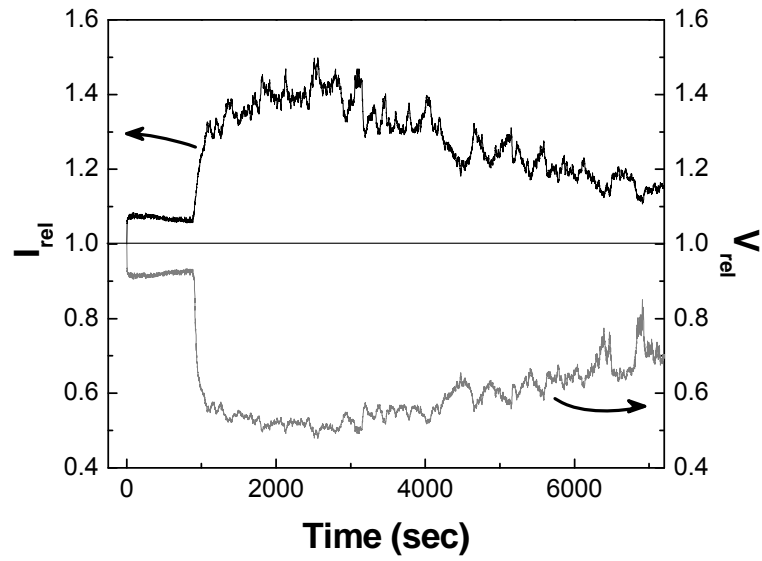

Figure S1. Long-term course of morphological change of WIV vaccine particles exposed to hyper-osmotic gradient of 0.3 osM at pH 2.0 and 4 °C for 2 h. Spectra are representative of  $n = 9$  replicate samples.
